# Supplementary material
Source: MDPI journal article supplement (https://www.mdpi.com/2073-4344/12/10/1166)
Supplement: s1 [file s1]

Supplementary Information

# Zinc oxide-graphene nanocomposite-based sensor for the electrochemical determination of cetirizine

Rakesh R. Sawkar<sup>1</sup>, Mahesh M. Shanbhag<sup>2</sup>, Suresh M. Tuwar<sup>1,\*</sup>, Kunal Mondal<sup>3,4\*</sup>, Nagaraj P. Shetti<sup>5,6\*</sup>

Figures:

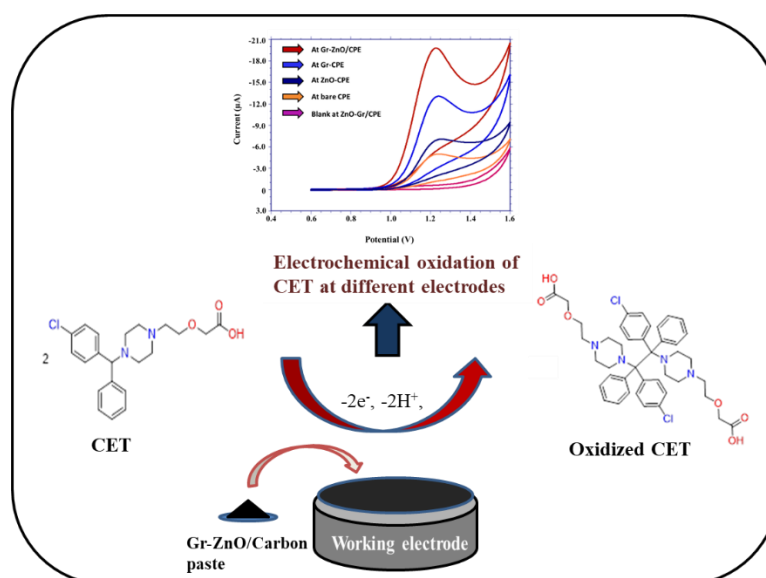

Figure S1. Graphical abstract of electrochemical oxidation of CET at ZnO-Gr/CPE.

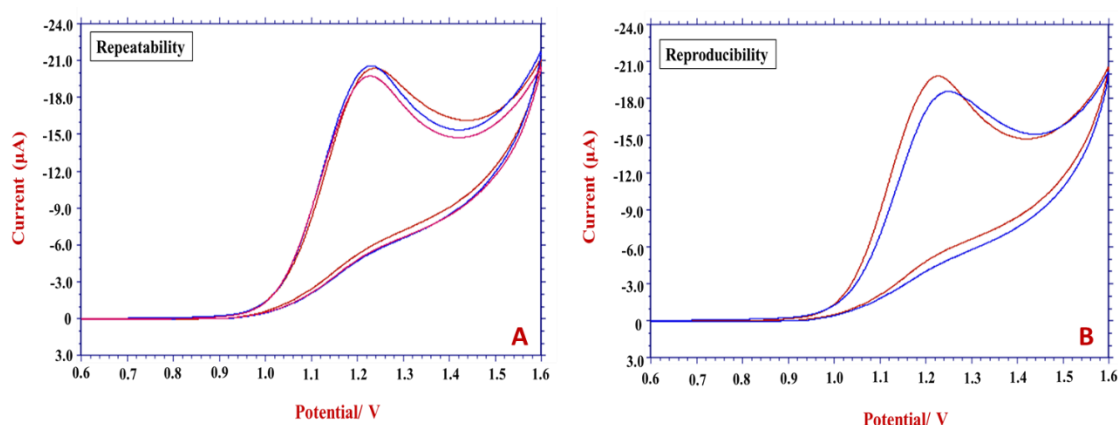

Figure S2. (A) Repeatability of ZnO-Gr/CPE, (B) Reproducibility of ZnO-Gr/CPE.

Tables:

Table S1. EDS of ZnO-Gr/CPE.

| Element | Mass %       | Atom %       |
|---------|--------------|--------------|
| C       | 80.89 ± 0.17 | 85.62 ± 0.18 |
| O       | 17.77 ± 0.32 | 14.12 ± 0.25 |
| Zn      | 1.34 ± 0.09  | 0.26 ± 0.02  |
